# Supplementary material for: How Do Pain-Response Patterns Influence the Course of Acute Low Back Pain? A Longitudinal Cohort Study
Source: Research Square preprint supplement (doi:10.21203/rs.3.rs-110189/v1), 2020-11-30
Supplement: Supplementary file 4 [file 675f07ca2986d619667efa48.docx]

**How do pain-response patterns influence the course of acute low back pain?**

**A longitudinal cohort study**

Ursula Surbeck1,2, Fabian Pfeiffer1, Sabina Hotz-Boendermaker1*,#a

1Zurich University of Applied Sciences (ZHAW), School of Health Professions, Institute of Physiotherapy, Winterthur, Switzerland

2Department of Physiotherapy and Occupational Therapy, University Hospital of Zurich Switzerland

*Corresponding author: [sabina.hotzboendermaker@zhaw.ch](mailto:sabina.hotzboendermaker@zhaw.ch) (SHB)

**S1 Table. Classification scheme for determination of the pattern**

| **AEM pattern** | **Score** |
| --- | --- |
| Adaptive pain-response (AR) | DASS <10  TSS<3 and BES <3 |
| Fear-avoidance response (FAR) | DASS ≥10  TSS<3 and BES <3 |
| Distress endurance response (DER) | DASS ≥10  TSS ≥3 and/or BES ≥3 |
| Eustress-endurance response (EER) | DASS <10  TSS ≥3 and/or BES ≥3 |

|  |  |  |  |
| --- | --- | --- | --- |

AEM, Avoidance-Endurance Model; DASS, Depression Anxiety Stress Scale (depression subscale); TSS, Thought Suppression Scale; BES, Behavioral Endurance Scale; Adapted: use of DASS, instead of BDI

Scholich et al., 2011

| **S2 Table. Correlations between outcome variables at the four measurement time points (n=51)** | | |  |
| --- | --- | --- | --- |
|  |  |  |  |
| Outcome variable | Time point | Spearman's rho |  |
|  |  | correlation coefficient | *P* < 0.05 |
| NRS and ODI | 1 | 0.29 | 0.040 |
|  | 2 | 0.61 | 0.001 |
|  | 3 | 0.70 | 0.001 |
|  | 4 | 0.66 | 0.001 |
|  |  |  |  |
| NRS and MCI | 1 | 0.15 | 0.281 |
|  | 2 | 0.11 | 0.430 |
|  | 3 | 0.13 | 0.354 |
|  | 4 | 0.005 | 0.973 |
|  |  |  |  |
| ODI and MCI | 1 | 0.30 | 0.036 |
|  | 2 | 0.11 | 0.434 |
|  | 3 | 0.05 | 0.723 |
|  | 4 | 0.04 | 0.764 |
|  |  |  |  |
| r = 0 .00–0.19 very weak, r = 0.20–0.39 weak, r = 0.40–0.59 moderate; r= 0.60–0.79 strong, r = 0.80–1.00 very strong effect | | | |
| *P* = *P*-value; NRS, numeric self-rating scale; ODI, Oswestry Disability Index; MCI, movement control impairment | | |  |
